# Supplementary material for: Genome-wide prediction of splice-modifying SNPs in human genes using a new analysis pipeline called AASsites
Source: PubMed Central journal article supplement (PMC3194194; doi:10.1186/1471-2105-12-s4-s2), 2011-07-05
Supplement: 1471-2105-12-S4-S2-S1.pdf [file 1471-2105-12-S4-S2-S1.pdf]

## Additional Material

Table 1: SNPs used for benchmarking AASsites

| POSITIVE SET |          |           |                      |                                     |                              |
|--------------|----------|-----------|----------------------|-------------------------------------|------------------------------|
| Gen          | CHRNE    | AA change | Mutation             | Position                            | Reference                    |
|              | CHRNE_1  |           | g.IVS6-1G>C*         | 3' splice site of intron 6          | Ohno <i>et al.</i> , 2005    |
|              | CHRNE_3  |           | g.IVS9-1G>A*         | 3'splice site of intron 9           |                              |
|              |          |           |                      | 16 bp duplication comprising 8 bp   |                              |
|              |          |           | g.IVS10-             | at 3' end of intron 10 and 8bp of   |                              |
|              | CHRNE_4  |           | 9_c.1167dup16*       | 5'end of exon 11                    |                              |
|              |          |           |                      | 23 bp deletion comprising 8 bp at   |                              |
|              |          |           | c.1259_g.IVS11+15del | 3' end of exon 11 and 15 bp at 5'   |                              |
|              | CHRNE_5  |           | 23                   | end of intron 11                    |                              |
|              |          |           |                      | G->T substitution at 3' end of exon |                              |
|              | CHRNE_6  |           | c.857G>T (p.R286M)   | 8                                   |                              |
|              | CHRNE_7  |           | g.IVS4-2A>C          | 3' splice site of intron 4          |                              |
|              | CHRNE_8  |           | g.IVS6+1G>T          | 5' splice site of intron 6          |                              |
|              | CHRNE_9  |           | g.IVS7+2T>C          | 5' splice site of intron 7          |                              |
|              | CHRNE_10 |           | g.IVS10+2T>G         | 5' splice site of intron 10         |                              |
|              |          |           |                      |                                     |                              |
| Gen          | GLA      | AA change | Mutation             | Position                            | Reference                    |
|              | GLA_1    |           | g.IVS3-1G>C          | 3' splice site of intron 3          | Germain <i>et al.</i> , 1999 |
|              |          |           |                      |                                     |                              |
| Gen          | MAN2B1   | AA change | Mutation             | Position                            | Reference                    |
|              | MAN2B1_1 |           | g.IVS5-1G>C          | AG->AC in acceptor site of intron 5 | Berg <i>et al.</i> , 1999    |

|            |           |                    |                                      |                      |
|------------|-----------|--------------------|--------------------------------------|----------------------|
| MAN2B1_2   |           | g.IVS7+2T>G        | GT->GG in donor site of intron 7     |                      |
|            |           |                    | Deletion of 25 bp preceding -2 in    |                      |
| MAN2B1_3   |           | g.IVS11-3del25     | acceptor site of intron 11           |                      |
| MAN2B1_4   |           | g.IVS12+2T>G       | GT->GG in donor site of intron 12    |                      |
| MAN2B1_5   |           | g.IVS14+1G>C       | GT->CT in donor site of intron 14    |                      |
| MAN2B1_6   |           | g.IVS14-2A>G       | AG->GG in acceptor site of intron 14 |                      |
| MAN2B1_7   |           | g.IVS17+1G>A       | GT->AT in donor site of intron 17    |                      |
| MAN2B1_8   |           | g.IVS17+1G>T       | GT->TT in donor site of intron 17    |                      |
| <hr/>      |           |                    |                                      |                      |
| Gen PRPF31 | AA change | Mutation           | Position                             | Reference            |
| PRPF31_1   |           | g.IVS5-1G>A        | at the position 1 of the Intron 5    | Xia et al., 2004     |
| <hr/>      |           |                    |                                      |                      |
| Gen HMBS   | AA change | Mutation           | Position                             | Reference            |
|            |           |                    |                                      | De Siervi et al.,    |
| HMBS_3     |           | c.900delT          | Deletion of a single T in exon 14    | 1999                 |
| <hr/>      |           |                    |                                      |                      |
| Gen ATM    | AA change | Mutation           | Position                             | Reference            |
| ATM_0      |           | g.IVS29-1G->A      | At position 1 of intron 29           | Eng et al., 2004     |
| ATM_2      |           | g.IVS20-597delAAGT | At position 579 of intron 20         |                      |
| ATM_3      | W2483X    | c.7449G->A         | At position 7449 (exon 52)           |                      |
| ATM_4      | A2622V    | c.7865C->T         | At position 7865 (exon 55)           |                      |
| ATM_5      | Y171Y     | c.513C->T          | At position 513 (exon 8)             |                      |
| ATM_6      |           | g.IVS11-2A->G      | At position 2 of intron 11           |                      |
| ATM_7      |           | g.IVS37-5delTCTA   | At position 5 of intron 37           |                      |
| ATM_8      |           | g.IVS21-2A->G      | At position 2 of intron 21           |                      |
| ATM_9      |           | g.IVS38-2A->C      | At position 2 of intron 38           |                      |
| <hr/>      |           |                    |                                      |                      |
| Gen OPA1   | AA change | Mutation           | Position                             | Reference            |
| OPA1_1     |           | c.2014-1G>A        | Intron 20                            | Schimpf et al., 2006 |

|        |             |           |
|--------|-------------|-----------|
| OPA1_2 | c.2013G>A   | Exon 20   |
| OPA1_3 | c.1705+1G>T | Intron 17 |
| OPA1_4 | c.2708-1G>T | Intron 26 |
| OPA1_5 | c.1141G>A   | Exon 11   |
| OPA1_7 | c.2354A>G   | Exon 23   |
| OPA1_8 | c.2614-9A>G | Intron 25 |

| NEGATIVE SET |       |           |          |                      |                                     |
|--------------|-------|-----------|----------|----------------------|-------------------------------------|
| Gen          | ADA   | AA change | Mutation | Position             | Reference                           |
|              |       |           |          |                      | Santisteban <i>et al.</i> ,<br>1993 |
| ADA_1        | V177M | c.529G>A  |          | Exon 6(bp 529)       |                                     |
| ADA_2        | R101L | c.302G>T  |          | Exon 4 (bp 302)      |                                     |
| ADA_3        | S291L | c.872C>T  |          | Exon 10 (bp 872)     |                                     |
| ADA_4        | R156H | c.467G>A  |          | Exon 5 (bp 467)      |                                     |
| ADA_5        | G216R | c.646G>A  |          | Exon 7 (bp 646)      |                                     |
| Gen          | GLA   | AA change | Mutation | Position             | Reference                           |
|              |       |           |          |                      | Germain <i>et al.</i> ,<br>1999     |
| GLA_10       | C202W | TGT->TGG  |          | Exon 4 (cdna bp 606) |                                     |
| GLA_11       | C223G | TGC->GGC  |          | Exon 5 (cdna bp 667) |                                     |
| GLA_12       | N224D | AAT->GAT  |          | Exon 5 (cdna bp 670) |                                     |
| GLA_13       | R301Q | CGA->CAA  |          | Exon 6 (cdna bp 902) |                                     |
| GLA_14       | Q327K | CAA->AAA  |          | Exon 6 (cdna bp 979) |                                     |
| Gen          | HMBS  | AA change | Mutation | Position             | Reference                           |
| HMBS_1       | R149Q | CGA->CAA  |          | Exon 9 (bp 446)      | De Siervi <i>et al.</i> ,           |

|           |        |           |                  | 1999              |                             |
|-----------|--------|-----------|------------------|-------------------|-----------------------------|
| HMBS_2    | L245L  | CTT->CTG  | Exon 12 (bp 735) |                   |                             |
|           |        |           |                  |                   |                             |
| Gen       | MAN2B1 | AA change | Mutation         | Position          | Reference                   |
| MAN2B1_9  | H72L   | A->T      |                  | Exon 2 (bp 215)   | Berg et al., 1999           |
| MAN2B1_10 | T355P  | A->C      |                  | Exon 8(bp 1063)   |                             |
| MAN2B1_11 | P356R  | C->G      |                  | Exon 8 (bp 1067)  |                             |
| MAN2B1_12 | E402K  | G->A      |                  | Exon 9 (bp 1204)  |                             |
| MAN2B1_13 | W714R  | T->C      |                  | Exon 17 (bp 2140) |                             |
| MAN2B1_14 | R750W  | C->T      |                  | Exon 18 (bp 2248) |                             |
| MAN2B1_15 | L809P  | T->C      |                  | Exon 20 (bp 2426) |                             |
|           |        |           |                  |                   |                             |
| Gen       | PKP2   | AA change | Mutation         | Position          | Reference                   |
| PKP2_1    | S140F  | C->T      |                  | Exon 3 (bp 419)   | Gerull <i>et al.</i> , 2004 |
| PKP2_2    | S615F  | C->T      |                  | Exon 9 (bp 1844)  |                             |
| PKP2_3    | K654Q  | A->C      |                  | Exon 9 (bp 1960)  |                             |
| PKP2_4    | C796R  | T->C      |                  | Exon 12 (bp 2386) |                             |

References for Table 1 :

Berg, T., Riise, H. M., Hansen, G. M., Malm, D., Tranebjaerg, L., Tollersrud, O. K., & Nilssen, O. 1999. Spectrum of mutations in alpha-mannosidosis. *Am J Hum Genet*, **64**(1), 77–88.

De Siervi, A., Mendez, M., Parera, V.E., Varela, L., Batlle, A.M. and Rossetti, M.V. (1999) Acute intermittent porphyria: characterization of two novel mutations in the porphobilinogen

deaminase gene, one amino acid deletion (453-455delAGC) and one splicing acceptor site mutation (IVS8-1G>T). *Hum Mutat*, 14, 355

Eng, Laura, Coutinho, Gabriela, Nahas, Shareef, Yeo, Gene, Tanouye, Robert, Babaei, Mahnoush, D'ork, Thilo, Burge, Christopher, & Gatti, Richard A. 2004.

Nonclassical splicing mutations in the coding and noncoding regions of the ATM Gene: maximum entropy estimates of splice junction strengths. *Hum Mutat*, **23**(1), 67–76.

Germain, D. P., & Poenaru, L. 1999. Fabry disease: identification of novel alpha-galactosidase A mutations and molecular carrier detection by use of fluorescent chemical cleavage of mismatches. *Biochem Biophys Res Commun*, 257(3), 708–713

Gerull, Brenda, Heuser, Arnd, Wichter, Thomas, Paul, Matthias, Basson, Craig T, McDermott, Deborah A, Lerman, Bruce B, Markowitz, Steve M, Ellinor, Patrick T, MacRae, Calum A, Peters, Stefan, Grossmann, Katja S, Drenckhahn, Jörg, Michely, Beate, Sasse-Klaassen, Sabine, Birchmeier, Walter, Dietz, Rainer, Breithardt, Günter, Schulze-Bahr, Eric, & Thierfelder, Ludwig. 2004. Mutations in the desmosomal protein plakophilin-2 are common in arrhythmogenic right ventricular cardiomyopathy. *Nat Genet*, **36**(11), 1162–1164.

Ohno, K., Tsujino, A., Shen, X-M., Milone, M., & Engel, A. G. 2005. Spectrum of splicing errors caused by CHRNE mutations affecting introns and intron/exon boundaries. *J Med Genet*, **42**(8), e53.

Santisteban, I., Arredondo-Vega, F. X., Kelly, S., Mary, A., Fischer, A., Hummell, D. S., Lawton, A., Sorensen, R. U., Stiehm, E. R., & Uribe, L. 1993. Novel splicing, missense, and deletion mutations in seven adenosine deaminase-deficient patients

with late/delayed onset of combined immunodeficiency disease. Contribution of genotype to phenotype. *J Clin Invest*, **92**(5), 2291–2302.

Schimpf, Simone, Schaich, Simone, & Wissinger, Bernd. 2006. Activation of cryptic splice sites is a frequent splicing defect mechanism caused by mutations in exon and intron sequences of the OPA1 gene. *Hum Genet*, **118**(6), 767–771.

Xia et al. (2004) A novel PRPF31 splice-site mutation in a Chinese family with autosomal dominant retinitis pigmentosa. *Mol. Vis.*, 10

Table 2: List of SNPs identified by AASsites and contained in the ssSNPTarget database\*

| Chr. | SNP        | Described Change | Gene name (ENSEMBL ID)       | Affected domain                     | Disease                                                             |
|------|------------|------------------|------------------------------|-------------------------------------|---------------------------------------------------------------------|
| 1    | rs61811105 |                  | AGL<br>(ENSG00000162688)     |                                     | Glykogenase                                                         |
| 1    | rs55888274 |                  | CR1<br>(ENSG00000203710)     |                                     | Tuberculosis; Lung fibrosis;                                        |
| 1    | rs4690223  |                  | IDUA<br>(ENSG00000127415)    |                                     | Hurler Syndrom                                                      |
| 1    | rs41313932 |                  | HAX1<br>(ENSG00000143575)    |                                     | Neutropenia                                                         |
| 1    | rs41283498 | Exon Skipping    | GSTM4<br>(ENSG00000168765)   |                                     | Lung cancer                                                         |
| 1    | rs41283130 |                  | HSD11B1<br>(ENSG00000117594) | ADH Zink-bindenene<br>Dehydrogenase | polycystic ovarial syndrome; High blood pressure; Diabetes Type II; |

|    |            |                   |                                                                          |                                    |
|----|------------|-------------------|--------------------------------------------------------------------------|------------------------------------|
|    |            |                   |                                                                          | Alzheimer disease                  |
| 1  | rs61726477 |                   | LMNA<br>(ENSG00000160789) Filamentprotein                                | Ertherosclerosis                   |
| 1  | rs55957903 | Exon<br>Skipping  | PCTK3<br>(ENSG00000117266)                                               |                                    |
| 3  | rs5030815  | Exon<br>Skipping  | VHL<br>(ENSG00000134086) HVL (Hippel-Landau tumor<br>suppression protein | Kidney carcinoma                   |
| 4  | rs55737343 |                   | KIT<br>(ENSG00000157404)                                                 | Leukemia                           |
| 5  | rs60770849 |                   | ITGA1<br>(ENSG00000213949)                                               | Diabetes Type II;<br>liver disease |
| 6  | rs1126474  |                   | GLP1R<br>(ENSG00000112164) 7 transmembrane receptor                      | Diabetes Type II                   |
| 7  | rs1140478  |                   | EZH2<br>(ENSG00000106462)                                                | Prostate cancer                    |
| 10 | rs57979136 |                   | SLC18A2<br>(ENSG00000165646)                                             | Parkinson disease                  |
| 11 | rs58174038 |                   | SLC22A12<br>(ENSG00000197891) Transporter of sugar                       | Kidney disease;<br>Hyperurikemia   |
| 12 | rs1139788  | Exon<br>Extension | ATP6V0A2<br>(ENSG00000185344) V-Typ ATPase 116kDA family                 | Cutix Laxa                         |
| 15 | rs55966303 |                   | LRRK1<br>(ENSG00000154237) Domain of the RAS family                      | Parkinson disease                  |
| 16 | rs36023846 |                   | SCNN1B<br>(ENSG00000168447)                                              | High blood pressure                |
| 16 | rs4548893  |                   | AC093520.4<br>(ENSG00000214645)                                          | Tuberculosis                       |
| 16 | rs45517091 | Exon<br>Skipping  | TSC2<br>(ENSG00000103197)                                                | Tuberculosis                       |

|    |            |                  |                               |                                                        |                                                |
|----|------------|------------------|-------------------------------|--------------------------------------------------------|------------------------------------------------|
| 16 | rs57263696 |                  | CES2<br>(ENSG00000172831)     | Alpha-Beta Hydrolase; Prolyl-<br>Oligopeptidase Family | Cancer                                         |
| 16 | rs62054483 | Exon<br>Skipping | GCSH<br>(ENSG00000140905)     | Glycin spaltendes H-Protein                            | Hyperglycinamie                                |
| 18 | rs56302501 |                  | GNAL<br>(ENSG00000141404)     | Domain of the G-Protein Alpha<br>subunit               | Dbipolare Störungen                            |
| 19 | rs36000627 |                  | ACTN4<br>(ENSG00000130402)    | Calponin Homolog                                       | Glomerulosclerosis                             |
| 19 | rs1833783  |                  | FTL<br>(ENSG00000087086)      | Ferritin similar                                       | Parkinson disease                              |
| 19 | rs34044708 |                  | GAPDHS<br>(ENSG00000105679)   | Glyceraldehyd Domain                                   | Alzheimer disease                              |
| 19 | rs61222528 | Exon<br>Skipping | NCAN<br>(ENSG00000130287)     | Lectine C-Typ Domain                                   |                                                |
| 19 | rs59309543 |                  | PRKCG<br>(ENSG00000126583)    | Tyrosine kinase Domain                                 | Spinocerebellar ataxia                         |
| 20 | rs11547860 |                  | SNAP25<br>(ENSG00000132639)   |                                                        | Attention-deficit<br>hyperactivity<br>disorder |
| 22 | rs2330844  |                  | GGT1<br>(ENSG00000100031)     |                                                        | Glutathiononuria                               |
| 22 | rs5027908  |                  | SHANK3<br>(ENSG00000099882)   | SH3 Domain                                             | Autism                                         |
| X  | rs10465407 |                  | SLC25A14<br>(ENSG00000102078) | Mitochondrial transport protein                        | Schizophrenia                                  |

\*) ssSNPTarget is a database of genome wide splice-site SNPs
